# Supplementary material for: Implementing Concept-based Learning in a Large Undergraduate Classroom
Source: Atypon-hosted journal article supplement (doi:10.1187/cbe.07-09-0071), 2008-06-01
Supplement: supp1.pdf [file supp1.pdf]

## CONCEPT LIST

### 1) EVOLUTION OF THE CELL

- 1.1 The molecules of life may have had an abiotic origin**  
Example 1: the Stanley Miller experiment  
Problem : Pasteur's swan neck flasks with the Miller experiment product
- 1.2 RNA is a potentially self-replicating catalyst**  
Example 1: the RNA virus  
Counterexample 2: RNase P  
Example 3: In vitro selection of RNA ligases  
Problem : Use the examples to illustrate the strategy of discrimination
- 1.3 Amphiphilic lipids assembled in bilayers can form compartments**  
Example 1: Lipid bilayers  
Counterexample 2: Emulsions and salad dressing  
Example 3: Cells  
CMAP training : Put given key words in hierarchy
- 1.4 RNA instability may have lead to specialization : DNA as information storage and proteins as catalysts**  
Example 1: DNA can be replicated or repaired by complementary strands  
Example 2: Chemical variation in amino acids  
Example 3: RNA is intermediate between DNA and protein  
CMAP training : Select key words from concept
- 1.5 Nutrient availability may have driven procaryote evolution**  
Example 1: Sequential reactions  
Example 2: New environments and deep sea archebacteria  
Example 3: Photosynthesis  
CMAP training : Select linking words for a concept map with given key words and hierarchy
- 1.6 Eukaryotes may have arisen through endosymbioses**  
Example 1: Chloroplasts  
Counterexample 2: ER  
Example 3: Mitochondria and hydrogenosomes  
CMAP training : select key words, organize them in a hierarchy and add linking words
- 1.7 Modern cells have a common ancestor**  
Example 1: Conservation of the genetic code  
Counterexample 2: All cells have DNA  
Example 3: Mutations and phylogenetic trees  
Problem : Figure 1.6 (MBoC4, a problems approach)

### 2) STRUCTURE AND FUNCTION OF MACROMOLECULES

- 2.1 Recognition between macromolecules requires complementarity**  
Example 1: DNA strands in double helix  
Example 2: Antibody and antigen reactions  
Problem : Use the strategy of analogy to find complementarity in everyday life
- 2.2 Different macromolecules have different sequences**  
Example 1: Fred Sanger and the first protein sequence  
Example 2: DNA fingerprinting in forensics  
Problem : Figure 8-15 (MBoC4, a problems approach)

### **2.3 Different sequences form different three dimensional structures**

Example 1: Crystallization of Urease

Counterexample 2: The DNA double helix

Example 3 : The surface of the double helix

### **2.4 Three dimensional structures have defined functions**

Example 1: DNA functions in replication and repair

Example 2: Chymotrypsin

Example 3: Ras and allostery

Problem : Renaturation of RNase with and without mercaptoethanol

### **2.5 Macromolecular construction is modular**

Example 1: Secondary structure

Example 2: Protein motifs and domains

Example 3: Polymers

Problem : Figure 3-8 (MBoC4, a problems approach)

## **3) VISUALIZATION OF STRUCTURES**

### **3.1 The resolution of the light microscope is limited by diffraction**

Example 1: Diffraction in a microscope

Example 2: Magnifying glass

Example 3: Consequences of diffraction (DEMO: laser through microscope grid)

Problem : Strategy of generalization : similarities between microscope and telescope

### **3.2 Observing samples is also limited by thickness and contrast**

Example 1: Thick sections

Example 2: Contrast

### **3.3 Transmission electron microscopy and X-ray diffraction also produce diffraction patterns**

Example 1: TEM

Example 2: X-ray crystallography

### **3.3 Diffraction and refraction can be exploited to produce better images**

Example 1: Dark field

Example 2: Phase contrast

Example 3: DIC

### **3.4 Some microscopes use light that does not pass through the sample**

Example 1: Scanning microscope

Example 2: Fluorescence microscope

Example 3: Confocal microscope

Problem : The use of GFP bunny

### **3.5 Specific colorants can give precise information on macromolecular location**

Example 1: DAPI

Example 2: OsO<sub>4</sub>

Example 3: Antibodies

Example 4: In situ hybridization

Problem : Figure 3-17 (MBoC4, a problems approach)

## **4 EXTRACELLULAR MATRIX AND THE PLASMA MEMBRANE**

### **4.1 All cells have an extracellular matrix outside the plasma membrane**

Example 1: ECM of animal cells

Example 2: ECM of plant cells

Problem : Matrix metalloproteinases as cancer treatments

**4.2 The plasma membrane is a lipid bilayer with two distinct sides**

Example 1: Langmuir trough

Example 2: Vectorial labeling

Problem : Table 10-2 (MBoC4, a problems approach)

**4.3 The membrane is a bidimensional fluid**

Example 1: Recovery of fluorescence after photodecoloration

Example 2: Membrane melting temperatures

Problem : Flatland (E. Abbott) and membrane life

**4.4 Proteins are not always free to diffuse in the plane of the membrane**

Example 1: Bacteriorhodopsin

Example 2: Tight junctions

Problem : Figure 10-12 (MBoC4, a problems approach)

**4.5 Transmembrane proteins typically have short non-polar alpha helical regions**

Example 1: Hydrophobicity index

Counter example 2:  $\beta$  barrels

Problem : Problem 10-33 (MBoC4, a problems approach)

**4.6 Membrane permeability is selective**

Example 1: Tonicity and aquaporins

Example 2: Plasmolysis

Example 3: Protein transporters

Example 4: Active transport

Example 5:  $K^+$  channel

Analogy : What membrane component is like a bridge? A ferry?

**4.7 Animal cells have a  $Na^+/K^+$  dependant ATPase in the membrane**

Example 1:  $Na^+/K^+$  dependant ATPase and osmotic strength

Example 2: type V  $H^+$  pump in plants

Example 3: ABC transporters

Problem : Behavior of artificial vesicles with  $Na^+/K^+$  dependant ATPase

**4.8  $K^+$  channels produce a membrane potential**

Example 1: specificity of  $K^+$  channel

Example 2: Nernst equation

Problem : Meiosis in invertebrate eggs initiated with KCl

**4.9 Changes in the permeability of the membrane toward an ion can result in membrane potential changes**

Example 1: Voltage gated  $Na^+$  channel

Example 2: Substrate gated channels

Example 3: Synaptic vesicles

Problem : Meiosis in invertebrate eggs not initiated with KCl without  $Ca^{++}$

**5) CYTOPLASM**

**5.1 Eukaryotic cells have internal membranes and an extensive cytoskeleton**

Example 1: Eukaryotic cell

Counter example 3: Prokaryotic cells

Problem : Role of creS in Caulobacter (Ausmees 2003 Cell 115 705)

**5.2 Actin filaments are abundant in the cell cortex**

Example 1: Monomer polymerization

Example 2: Cell cortex

Example 3: Adherent junctions

Example 4: Focal contacts and integrins

Problem : Figure 16-12 (MBoC4, a problems approach)

### **5.3 Intermediate filaments support the plasma membrane and the nuclear envelop**

Example 1: Monomer polymerization

Example 2: Keratines

Example 3: Nuclear lamins

Example 4: Desmosomes

Problem : Dynamism of IFs (Ho 1998 J.Cell Sci. 111 1767)

### **5.4 Microtubules arise from centrosomes**

Example 1: Monomer polymerization

Example 2: MTOC

Example 3: Mitotic spindle

Problem : Figure 16-22 (MBoC4, a problems approach)

### **5.5 Motor proteins move along directional filaments**

Example 1: Cytoplasmic streaming

Example 2: Fish scale color

Example 3: Cilia and flagella

Problem : Figure 16-33 (MBoC4, a problems approach)

### **5.5 Transfer RNAs are cytoplasmic adaptors that decode the DNA**

Example 1: genetic code

Example 2: Anticodon

Example 3: Aminoacyl tRNA synthases

Problem : Figure 6-28 (MBoC4, a problems approach)

### **5.6 A ribosome is a cytoplasmic protein synthesis factory**

Example 1: Different subunits

Example 2: Binding sites

Example 3: Initiation

Example 4: Elongation

Example 5: Termination

Problem : Figure 6-54 (MBoC4, a problems approach)

### **5.7 Translation can be regulated by RNA sequences**

Example 1: eIF2 and viral infection

Counter example 2: RNA amount and protein synthesis

Example 3: Iron response element binding protein

Problem : Translational control

### **5.8 Protein activity can be regulated after translation is complete**

Example 1: Chaperones

Example 2: Phosphorylation

Example 3: Allostery

Example 4: Ubiquitination

Problem : Figure 6-41 (MBoC4, a problems approach)

## **6) SUBCELLULAR COMPARTMENTS**

### **6.1 Eukaryotes have the same types of organelles**

Example 1: Nucleus

Example 2: Mitochondria and chloroplasts

Example 3: Endoplasmic reticulum

Problem : Strategy of analogy : what steps are needed to put groceries away in the fridge

## **6.2 Nuclear pores connect the cytoplasm with the inside of the nucleus**

Example 1: Nuclear pore structure

Example 2: Karyopherins and NLS

Problem : Figure 12-9 (MBoC4, a problems approach)

## **6.3 Signal peptides target proteins to the mitochondria and chloroplasts**

Example 1: Signal peptide

Example 2: TIM and TOM

Problem : Interpretation of ribosomes on mitochondria in presence of cycloheximide

## **6.4 The ER plays several roles in the cell**

Example 1: Smooth and rough ER

Example 2: Lipid synthesis, scramblases and flippases

Example 3: Sarcoplasmic reticulum

Problem : Can RER and SER be contiguous membranes with different protein complements?

## **6.5 Protein entry in the ER is co-translational**

Example 1: Signal peptide

Example 2: SRP

Example 3: Stop transfer signals and topology

Example 4: KDEL

Problem : Problem 12-84 (MBoC4, a problems approach)

## **6.6 Proteins can be modified in the ER**

Example 1: Disulfide isomerase

Example 2: Oligosaccharide transferase

Example 3: GPI anchors

Problem : Strategy of analogy: what steps are needed to move goods by truck?

## **6.7 Transport between the ER and the Golgi is specific and tightly regulated**

Example 1: COPII coats

Example 2: Sar1 and vesicle formation

Example 3: Rabs and SNAREs and docking specificity

Problem : Botulinum Toxin : Lethal weapon or magic bullet?

## **6.8 The Golgi has different regions with different functions**

Example 1: Golgi regions

Example 2: COPI, ARF and brefeldin A

Example 3: Protein sorting

Problem : What has to happen to SNAREs after vesicles fuse?

## **6.9 Lysosomes are intracellular sites for digestion**

Example 1: The dinosaurs in Jurassic Park

Example 2: M6P

Example 3: Clathrin and adaptins

Problem : Melanosomes, adaptin mutants and mutant pale furred mice

## **6.10 Vesicular transport to the exterior of the cell can be constitutive or controlled**

Example 1: Default pathway of protein secretion

Example 2: Secretory vesicles

Problem : Amount of VSV G-protein in vesicles and Golgi: concentration in transport vesicles?

#### **6.11 Endosomes sort molecules coming from the plasma membrane**

Example 1: Coated pits

Example 2: Phagocytosis

Problem : Figure 13-16 (MBoC4, a problems approach)

### **7) ENERGY CONVERSION: MITOCHONDRIA AND CHLOROPLASTS**

#### **7.1 Mitochondria and chloroplasts exploit the chemiosmotic process**

Example 1:  $\Delta G = -nF\Delta E$

Example 2: Proton pumps

Example 3: Proton motive force

Problem : Calculate  $\Delta G$  from several  $E_o'$  values

#### **7.2 Mitochondria have four different regions**

Example 1: Mitochondrial structure

Example 2: Separation of mitochondrial regions by centrifugation

Example 3: Porines in the outer membrane

Example 4: Functions in mitochondrial vesicles

Example 5: Stromal enzymes

Problem : Figure 14-6 (MBoC4, a problems approach)

#### **7.3 L'ATP synthase interconverts energy in ATP and in a pH gradient**

Example 1: ATP synthase in mitochondrial vesicles

Example 2: Proton gradients and membrane potential

Example 3: ATP synthase structure and function

Problem : Use of dinitrophenol as weight loss treatment.

#### **7.4 The electron transport chain pumps protons out of the matrix**

Example 1: Electron transport proteins

Example 2: NADH dehydrogenase complex

Problem : What happens to a cell exposed to cyanide?

#### **7.5 Electron transport complexes may have evolved before high O<sub>2</sub> levels**

Example 1: Fermentation

Problem : Intelligent design and the electron transport chain

#### **7.6 Mitochondria and chloroplasts have their own DNA**

Example 1: DAPI and chloroamphenicol

Example 2: Petit mutants in yeast

Example 3: Missing genes in mitochondria

Problem : Is *Giardia lamblia* an ancestral eukaryote without mitochondria?

#### **7.7 Chloroplasts have an additional compartment compared to mitochondria**

Example 1: Chloroplast structure

Example 2: Thylakoids

Example 3: Stromal enzymes

Problem : Strategy of discrimination : similarity between thylakoids and cristae.

#### **7.8 There are only three photosystems in organisms using solar power**

Example 1: Bacteriorhodopsin

Example 2: Sulfobacteria and photosystem I

Example 3: Purple bacteria and photosystem II

Problem : Why are purple bacteria not green?

## **7.9 Cyanobacteria combined two of the three different photosystems to take electrons from H<sub>2</sub>O**

Example 1: Z-scheme

Example 2: Water as a source of electrons

Example 3: Cyclic photophosphorylation

Problem : Figure 14-20 (MBoC4, a problems approach)

## **7.10 Rubisco catalyses CO<sub>2</sub> fixation**

Example 1: Rubisco and photorespiration

Example 2: C<sub>4</sub> plants

Problem : Figure 14-14 (MBoC4, a problems approach)

## **8) NUCLEUS**

### **8.1 The nucleus protects the DNA and newly synthesized RNA**

Example 1: Prokaryotes and motor proteins

Example 2: Prokaryotes and RNA modification

### **8.2 Genetic information is stored as genes on chromosomes**

Example 1: Mendel's deductions

Example 2: Chromosomes fulfill Mendel's requirements

Example 3: Gene structure

Example 4: Repetitive DNA

Problem : Figure 4-5 (MBoC4, a problems approach)

### **8.3 Linear chromosomes have a centromere, two telomeres and several origins of replication**

Example 1: Replication and Okazaki fragments

Example 2: Telomere logic

Example 3: Centromeres

Problem : Figure 4-6 (MBoC4, a problems approach)

### **8.4 Chromosomes have different structures in interphase and mitosis**

Example 1: FISH and interphase chromosomes

Example 2: Mitotic chromosomes

### **8.5 Nuclear DNA is compacted by histones**

Example 1: Nucleosomes

Example 2: 30 nm fiber

Example 3: Histone code

Problem : Random or specific nucleosome formation?

### **8.6 RNA synthesis from genes requires an RNA polymerase**

Example 1: Prokaryotic RNA polymerase, TATA and GACA boxes

Example 2: Eukaryotic RNA polymerases

Problem : Figure 6-5 (MBoC4, a problems approach)

### **8.7 Many factors regulate the rate of messenger RNA synthesis**

Example 1: Structure and function of specific transcription factors

Example 2: DNA structure and the LCR

Problem : Figure 7-14 (MBoC4, a problems approach)

### **8.8 Eukaryotic messages are modified after transcription**

Example 1: 7-mG Cap

Example 2: Polyadenylation

Example 3: Splicing

Problem : Figure 6-17 (MBoC4, a problems approach)

### **8.9 The nucleus contains compartments with specialized functions**

Example 1: Nucleolus

Example 2: Splicing islands

**8.10 The nucleus undergoes major changes during mitosis**

Example 1: Cell division cycle

Example 2: Phases of mitosis

Example 3: Cytokinesis

**8.11 Chromosome separation can be understood by the behavior of motor proteins**

Example 1: Prophase and kinesine

Example 2: Prometaphase, dyneine and kinesine

Example 3: Metaphase

Example 4: Anaphase, dyneine and kinesine

Problem : Figure 18-18 (MBoC4, a problems approach)

**8.11 Cell division happens differently in different cells**

Example 1: Animal cells

Example 2: Plant cells

Example 3: Bacteria

Problem : Figure 18-21 (MBoC4, a problems approach)

**8.11 Meiosis allows recombination between homologous chromosomes**

Example 1: Meiosis and behavior of homologous chromosomes

Example 2: Recombination nodules

Example 3: Recombination frequency
