# Supplementary material for: Implementing Concept-based Learning in a Large Undergraduate Classroom
Source: Atypon-hosted journal article supplement (doi:10.1187/cbe.07-09-0071), 2008-06-01
Supplement: supp2.pdf [file supp2.pdf]

## **Appendix 2 : Summary of Learning Strategies**

Compiled from: Denise Barbeau, Angelo Montini, Claude Roy (1997) Tracer les chemins de la connaissance - la motivation scolaire. Association Québécoise de pédagogie collégiale, 535 pp.

### **Cognitive Strategies**

#### **Repetition**

- Recopy
- Repeat over and over

#### **Elaboration**

- Take notes; Underline; Identify key words
- Make summaries; Paraphrase
- Formulate questions
- Work in teams
- Use mnemonics
- Find examples
- Find analogies; Make mental images

#### **Organization**

- Regroup; Classify; Compare
- Make schemas or networks
- Make links between concepts

#### **Generalization**

- Find reasons why an example illustrates a concept
- Find similarities between examples

#### **Discrimination**

- Find reasons why an example doesn't illustrate a concept
- Find differences between examples
- Find counter examples

### **Metacognitive Strategies**

#### **Planification**

- Analyze task
- Establish final and intermediate goals
- Estimate time required
- Decide on strategy to be used

#### **Control**

- Use auto evaluation and self-reinforcement
- Concentrate on the task
- Estimate time required

#### **Regulation**

- Evaluate the efficiency of the chosen strategy
- Estimate the expected result
- Know preferred strategies
- Understand when certain strategies can be used

### **Emotional Strategies**

- Speak to one's self
- Reward one's self
- Control anxiety
- Encourage the feeling of mastery over one's own learning
- Reduce unreasonable expectations
- Concentrate on the task

### **Management Strategies**

#### **Identify resources required to complete the task**

- Materials
- Colleagues
- Availability of teacher

#### **Time management**

- Make a schedule and adjust if necessary
- Plan shorter more frequent work periods
- Plan intermediate objectives

#### **Control the environment**

- Find appropriate location
- Find calm location

#### **Ask for help**

- From professor
- From colleagues
- Work in teams
